# Supplementary material for: Evaluating Large Language Models’ Performance in FDA Regulatory Science
Source: Research Square preprint supplement (doi:10.21203/rs.3.rs-8611276/v1), 2026-02-06
Supplement: Supplementary file 1 [file d5f5b3ea27e785e9da8b75af.docx]

**S1 Appendix. Information Extraction Categories Based on FDA cUTI Guidance**

For each antibiotic, nine categories of information were defined according to the U.S. Food and Drug Administration (FDA) Guidance for Industry: Complicated Urinary Tract Infections.These categories were used to structure the evaluation and prompting of large language models (LLMs).

1. Patient population for a cUTI trial, including ≥30% with pyelonephritis.
2. Trial design, including appropriate use of randomization, blinding, comparator, and trial type (noninferiority or superiority).
3. Inclusion criteria specifically require≥2 clinical symptoms and pyuria.
4. Exclusion criteria include exclusion of pre-treated patients, those with unrelated infections (e.g., prostatitis), or uncomplicated UTIs.
5. Appropriately address patient diversity and address plans for pediatric and pregnant populations, including renal/hepatic impairment.
6. Active comparator aligned with the U.S. standard of care and expert guidance (e.g., IDSA).
7. Primary efficacy endpoints, including use of a responder outcome (clinical + microbiologic success), were assessed at a fixed post-therapy time point with appropriate symptom resolution criteria.
8. Secondary endpoints include sustained symptom resolution and microbiologic success at 21–28 days, with separate reporting of clinical and microbiological outcomes.

Statistical considerations, including pre-specification of the analysis plan, definition of

ITT/micro-ITT populations, and use of micro-ITT for primary efficacy analysis.

**S2 Appendix. Example of Prompt Templates Used for Information Extraction**

The following example illustrates how general and detailed prompts were structured to evaluate whether Cefiderocol clinical trials included an appropriate patient population, as defined in the FDA’s *Guidance for Industry: Complicated Urinary Tract Infections.*

- General prompts:

“Using both the FDA Cefiderocol review and the FDA cUTI guidance, Does the clinical trial described in this Cefiderocol review include an appropriate patient population for the indication of complicated urinary tract infections (cUTI) including pyelonephritis? Specifically, does the trial meet the FDA recommendation that at least 30% of enrolled patients should have pyelonephritis?”

- Detailed Prompts:

“You are a regulatory affairs expert. Based on the FDA guidance titled “Complicated Urinary Tract Infections: Developing Drugs for Treatment,” please evaluate whether the clinical trial described in the following FDA review adheres to the patient population requirement. Specifically, answer the following questions:

1. Did the trial enroll patients with complicated urinary tract infections (cUTI)?
2. Did the trial include patients diagnosed with pyelonephritis?
3. Did at least 30% of the enrolled population have pyelonephritis, as required by FDA guidance for the indication “treatment of cUTI including pyelonephritis”?
4. Is the trial population appropriate to support this combined indication?

Provide your answer in a checklist format (Yes/No) with justification from the FDA review.

Each question was asked twice per model to assess consistency.
